# Supplementary material
Source: MDPI journal article supplement (https://www.mdpi.com/1424-2818/15/7/821)
Supplement: s1 [file s1]

# Microplastics Occurrence in Fish from Tocagua Lake, Low Basin Magdalena River, Colombia

Miranda-Peña Lindys <sup>1</sup>, Milena Urquijo <sup>1</sup>, Victoria A. Arana <sup>1</sup>, Roberto García-Alzate <sup>1</sup>, Carlos A. García-Alzate <sup>2,3</sup> and Jorge Trilleras <sup>4,\*</sup>

<sup>1</sup> Grupo de Investigación Ciencias, Educación y Tecnología-CETIC, Programa de Maestría en Ciencias Ambientales, Facultad de Ciencias Básicas, Universidad del Atlántico, Carrera 30 No. 8-49,

Puerto Colombia 081007, Colombia; lymiranda@mail.uniatlantico.edu.co (L.M.-P.);

milena\_0918@hotmail.com (M.U.); victoriaarana@mail.uniatlantico.edu.co (V.A.A.);

robertogarcia@mail.uniatlantico.edu.co (R.G.-A.)

<sup>2</sup> Grupo de Estudios en Sistemática y Conservación-GESC, Programa de Maestría en Biología, Facultad de Ciencias Básicas, Universidad del Atlántico, Carrera 30 No. 8-49, Puerto Colombia 081007, Colombia;

carlosgarciaa@mail.uniatlantico.edu.co

<sup>3</sup> Grupo de Estudios en Sistemática y Conservación-GESC, Programa de Ingeniería Ambiental y Sanitaria, Facultad de Ingeniería Ambiental y Sanitaria, Corporación Universitaria Autónoma del Cauca, Calle 5 No. 3-85, Popayán 190003, Colombia

<sup>4</sup> Grupo de Investigación Biodiversidad del Caribe Colombiano, Programa de Maestría en Biología, Facultad de Ciencias Básicas, Universidad del Atlántico, Carrera 30 No. 8-49, Puerto Colombia 081007, Colombia

<sup>5</sup> Grupo de Investigación en Compuestos Heterocíclicos, Programa de Maestría en Ciencias Químicas, Facultad de Ciencias Básicas, Universidad del Atlántico, Carrera 30 No. 8-49, Puerto Colombia 081007, Colombia

\* Correspondence: jorgetrilleras@mail.uniatlantico.edu.co.

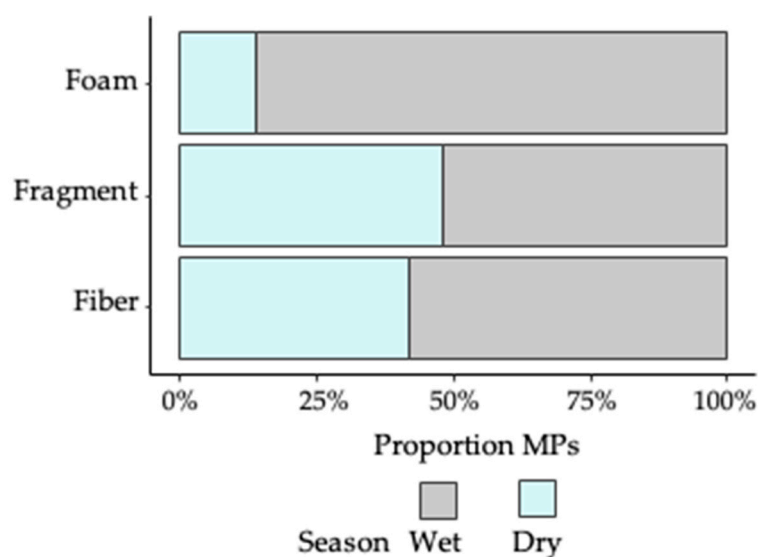

**Figure S1.** Proportion of the distribution of the shapes of microplastics identified in the water from Tocagua Lake in the wet and dry seasons.

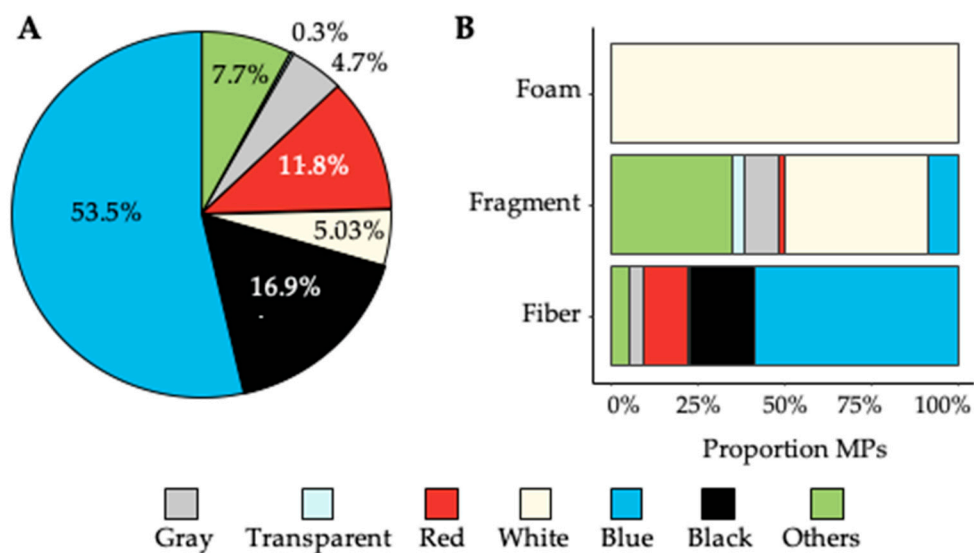

**Figure S2.** Typological characteristics of the MPs found in the water of Tocagua Lake in dry season. A: Color and B: Shape.

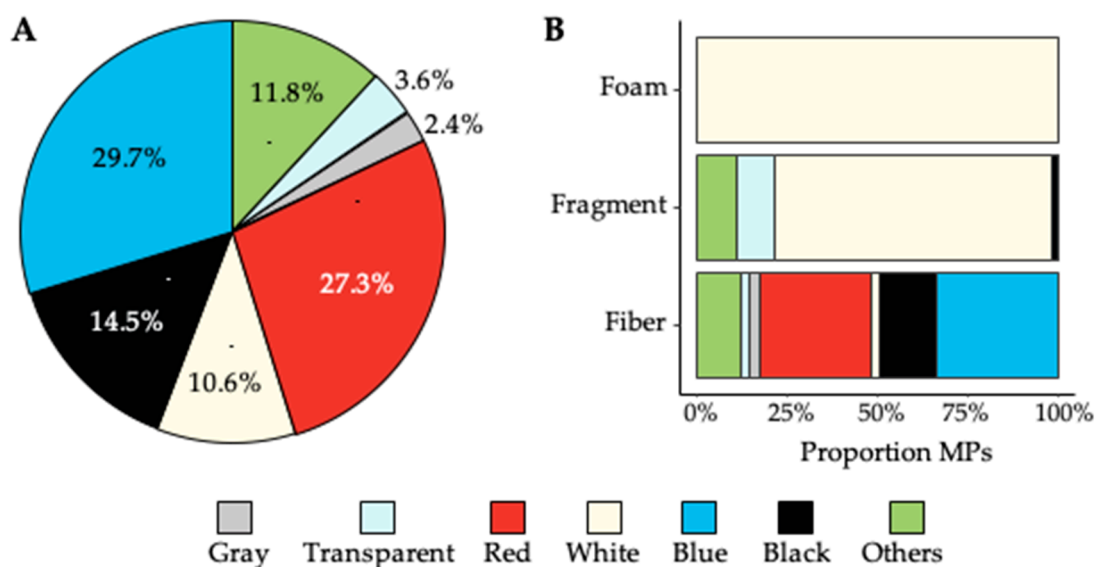

**Figure S3.** Typological characteristics of the MPs found in the water of Tocagua Lake in dry season. A: Color and B: Shape.

**Table S1.** Results of the negative binomial regression models to determine the association between the abundance of microplastics per individual according to the species and diet per season. No significant differences were observed.

| term                                | estimate | std.error | statistic | p-value |
|-------------------------------------|----------|-----------|-----------|---------|
| (Intercept)                         | 1.24     | 0.13      | 9.75      | 0       |
| Dry season                          | -0.20    | 0.19      | -1.09     | 0.279   |
| <i>Astyanax magdalenae</i> specie   | 0.04     | 0.29      | 0.13      | 0.899   |
| <i>Caquetaia krausii</i> specie     | -0.29    | 0.21      | -1.36     | 0.176   |
| <i>Mugil liza</i> specie            | -0.38    | 0.27      | -1.38     | 0.170   |
| <i>Oreochromis niloticus</i> specie | -0.10    | 0.23      | -0.42     | 0.672   |
| <i>Poecilia gilli</i> specie        | -0.27    | 0.18      | -1.50     | 0.135   |
| (Intercept)                         | 1.21     | 0.11      | 11.21     | 0       |
| Dry Season                          | -0.20    | 0.19      | -1.05     | 0.293   |
| Omnivorous–carnivorous diet         | -0.27    | 0.2       | -1.30     | 0.193   |
| Detritivorous–microalgae diet       | -0.35    | 0.27      | -1.32     | 0.188   |
| Omnivorous–insectivorous diet       | 0.07     | 0.28      | 0.23      | 0.816   |

**Table S2.** General description of studies on microplastics ingestion by fish from freshwater lake ecosystems. %FO: is the percentage of fish with at least one microplastic particle in the gastrointestinal tract.

| Country  | Lake           | Type        | Lake area (km <sup>2</sup> ) | Depth (m) | Season | Fish species                                                                                                     | N° Fish | N° MPs | %FO  | Mean MPs/Ind | MP shape                       | Mean particle size | MP composition                       | Color                                                                                                        | Reference     |
|----------|----------------|-------------|------------------------------|-----------|--------|------------------------------------------------------------------------------------------------------------------|---------|--------|------|--------------|--------------------------------|--------------------|--------------------------------------|--------------------------------------------------------------------------------------------------------------|---------------|
| Colombia | Lake Tocagua   | Rural       | 3                            | 2         | Dry    | Andinoacara latifrons, Caquetaia krausii, Mugil liza, Oreochromis niloticus, Poecilia gilli                      | 45      | 104    | 73.3 | 2.3 ± 3.6    | Fiber 68.9%,<br>Fragment 31.1% | 2320 ± 1254        | -                                    | blue 33%, transparent 24.3%, white 27.2%, red 1.9%, black 6.8%, Others 6.8%                                  | Present study |
|          |                |             |                              |           | Wet    | Andinoacara latifrons, Astyanax magdalenae, Caquetaia krausii, Mugil liza, Oreochromis niloticus, Poecilia gilli | 183     | 544    | 86.3 | 3 ± 2.5      | Fiber 97.8%,<br>Fragment 2.2%  | 1980 ± 1123)       | -                                    | blue 53.1%, transparent 5.1%, white 1.7%, red 5%, black 24.8%, gray 3.9%, Others 6.4%                        |               |
| Alemania | Lake Constance | Urban       | 539                          | 90        | -      | 15 Fish species                                                                                                  | 331     | -      | 16.5 | 0.2 ± 0.5    | Fiber 25%,<br>Fragment 75%     | 715 ± 981          | -                                    | blue 11.3%, clear 1.1%, yellow 5.8%, grey 8.7%, green 16.7%, red 13.2%, black 11.4%, white 27.3%, other 2.5% | [74]          |
| Suiza    | Lake Geneva    | Rural       | 581.3                        | 154       | -      | Alburnus alburnus, Perca fluviatilis, Rutilus rutilus, Leuciscus leuciscus                                       | 40      | 34     | 7.5  | 0.85 ± 4.9   | Fiber 91.2%,<br>Fragment 8.8%  |                    | -                                    | -                                                                                                            | [78]          |
| Tanzania | Lake Victoria  | Rural-Urban | 68,800                       | 40        | -      | Lates niloticus, Oreochromis niloticus                                                                           | 40      | -      | 20   | -            | -                              | <250 um            | PE/PPC, PE, PS, PUR, silicone rubber | -                                                                                                            | [73]          |

|          |            |             |     |         |     |                                                                                                                                                            |     |     |      |              |                                                          |             |                                                                                 |                                                                    |                              |      |
|----------|------------|-------------|-----|---------|-----|------------------------------------------------------------------------------------------------------------------------------------------------------------|-----|-----|------|--------------|----------------------------------------------------------|-------------|---------------------------------------------------------------------------------|--------------------------------------------------------------------|------------------------------|------|
| Ethiopia | Lake Ziway | Rural       | 442 | 2.5 a 9 | Dry | Oreochromis niloticus, Clarias gariepinus, Cyprinus carpio and Carassius carassius                                                                         | 180 |     | 30.5 | 4.4 ± 3.6    | Fragment 57.5%, Fiber 42.5%,                             | 4037 ± 3600 | PE 44%, PP48%, AV8%                                                             | blue transparent white 3.6%, green, black, pink                    | 37%, red, black, pink        | [33] |
|          |            |             |     |         | Wet | Oreochromis niloticus, Clarias gariepinus, Cyprinus carpio and Carassius carassius                                                                         | 180 | 414 | 38.8 | 3            |                                                          | 3957 ± 3400 |                                                                                 |                                                                    |                              |      |
| China    | Lake Chao  | Rural-Urban | 770 | 3.06    | Dry | Hypophthalmichthys molitrix, Hyporhamphus intermedius, Cyprinus carpio, Carassius auratus, Culter alburnus                                                 | 58  | 118 | 100  | 11.71 ± 6.58 | Fiber 88%, Debris 11.5%, Film0.5%                        | <500        | PP 29%, PET 28%, LDPE 6%,HDPE 5%, PE 20%, Others 1%, PVC 3%, PS 8%              | blue transparent white 2%, green 1%, black 46%, grey 23%           | 20%, red 1%, grey            | [75] |
|          |            |             |     |         | Wet | Hypophthalmichthys molitrix, Hyporhamphus intermedius, Cyprinus carpio, Carassius auratus, Culter alburnus                                                 | 60  |     | 100  | 9.07 ± 5.89  | Fiber 82%, Debris 12%, Film 6%                           | <500        | PP 48%, PET 25%, LDPE 2%,HDPE 7%, PE 9%, Others 2%, PVC 4%, PS 8%               | blue transparent white 2%, green 1%, black 34%, grey 19%           | 24%, 13%, red 1%, grey       |      |
| China    | Lake Chao  | Urban       | 760 | 5.5     | -   | Culter alburnus, Culter dabryi, Culter mongolicus, Tachysurus fulvidraco, Carassius aurato, Cyprinus carpio, Pseudolaubuca sinensis, Coilia brachygnathus, | 259 | -   | 99.6 | 9.03 ± 5.70  | Fiber 83.5%, Fragment 9.7%, film 6.3%, microspher e 0.5% | >1000       | PP 45.9%, PET 26.1%, LDPE 2.6%,HDPE 2.9%, PE 8.2%, Others 1.7%, PVC 4.7%, PS 8% | blue transparent , white 2.5%, green 0.7%, black 35.6%, gray 14.2% | 23,5%, 16.2%, red 0.7%, gray | [76] |

|       |             |             |                    |   |   |                                                                                         |    |    |    |      |                                           |                            |    |                                                              |      |  |  |
|-------|-------------|-------------|--------------------|---|---|-----------------------------------------------------------------------------------------|----|----|----|------|-------------------------------------------|----------------------------|----|--------------------------------------------------------------|------|--|--|
|       |             |             |                    |   |   | Hypophthalmichthys molitrix,<br>Hypophthalmichthys nobilis,<br>Hyporhamphus intermedius |    |    |    |      |                                           |                            |    |                                                              |      |  |  |
| China | Lake Poyang | Urban-Rural | Dry 1000, Wet 3000 | 8 | - | Carassius auratus                                                                       | 11 | 84 | 91 | 0–18 | Fiber 54%,<br>Fragment 25%,<br>14%,<br>7% | 500–1000<br>film<br>pellet | No | white 17%, black 10.55%,<br>coloured 45%,<br>transparent 27% | [77] |  |  |

## References for Supplementary Materials

33. Merga, L. B.; Redondo-Hasselerharm, P. E.; Van den Brink, P. J.; Koelmans, A. A. Distribution of microplastic and small macroplastic particles across four fish species and sediment in an African lake. *Sci. Total Environ.*, **2020**, 741, 140527. <https://doi.org/10.1016/j.scitotenv.2020.140527>
73. Biginagwa, F. J.; Mayoma, B. S.; Shashoua, Y.; Syberg, K.; Khan, F. R. First evidence of microplastics in the African Great Lakes: Recovery from Lake Victoria Nile perch and Nile tilapia. *J. Great Lakes Res.*, **2016**, 42, 146–149. <https://doi.org/10.1016/j.jglr.2015.10.012>
74. Roch, S.; Walter, T.; Ittner, L. D.; Friedrich, C.; Brinker, A. A systematic study of the microplastic burden in freshwater fishes of south-western Germany – Are we searching at the right scale? *Sci. Total Environ.*, **2019**, 689, 1001–1011. <https://doi.org/10.1016/j.scitotenv.2019.06.404>
75. Wu, J.; Yin, X.; Liu, Y.; Chen, X.; Xie, C.; Liang, Y.; Li, J.; Jiang, Z. Seasonal variation and ecological risk assessment of microplastics ingested by economic fishes in Lake Chaohu, China. *Sci. Total Environ.*, **2022**, 833, 155181. <https://doi.org/10.1016/j.scitotenv.2022.155181>
76. Yin, X.; Wu, J.; Liu, Y.; Chen, X.; Xie, C.; Liang, Y.; Li, J.; Jiang, Z. Accumulation of microplastics in fish guts and gills from a large natural lake: Selective or non-selective? *Environ. Pollut.*, **2022**, 309, 119785. <https://doi.org/10.1016/j.envpol.2022.119785>
77. Yuan, W.; Liu, X.; Wang, W.; Di, M.; Wang, J. Microplastic abundance, distribution and composition in water, sediments, and wild fish from Poyang Lake, China. *Ecotoxicol. Environ. Saf.*, **2019**, 170, 180–187. <https://doi.org/10.1016/j.ecoenv.2018.11.126>
78. Faure, F.; Demars, C.; Wieser, O.; Kunz, M.; Alencastro, L. F.; de Faure, F.; Demars, C.; Wieser, O.; Kunz, M.; Alencastro, L. F. Plastic pollution in Swiss surface waters: Nature and concentrations, interaction with pollutants. *Environ. Chem.*, **2015**, 12, 582–591. <https://doi.org/10.1071/EN14218>
